# Supplementary material
Source: PubMed Central journal article supplement (PMC2675626)
Supplement: E08-09-0893_1.pdf [file E08-09-0893_1.pdf]

## Supplemental Figure Legends

**Figure S1.** Nrd1 exhibits genetic interactions with type II myosin. (A) The Nrd1 deletion exacerbated the phenotypes of the *myo2-E1* mutants. Cells as indicated were streaked onto YPD plates and incubated at the indicated temperatures. (B) The Nrd1 deletion exacerbated the phenotypes of the  $\Delta rlc1$  mutants. Cells as indicated were streaked onto YPD plates and incubated at the temperature as indicated. (C, D) Cells as indicated were incubated at 30°C and then stained with calcofluor to visualize the cell wall and septum. Bar, 10  $\mu$ m.

**Figure S2.** Pmk1 exhibits genetic interactions with type II myosin. (A) Pmk1 deletion suppresses the temperature sensitivity of the *cdc4-312* mutants. Cells as indicated were analyzed as described in Figure 1A. (B) Pmk1 deletion affects the cytokinesis defects of the *cdc4-312* mutants. Cells as indicated were incubated at 27°C and then stained with calcofluor to visualize the cell wall and septum. Bar, 10  $\mu$ m. (C) Pmk1 deletion rescued the phenotypes of the  $\Delta rlc1$  mutants. Cells as indicated were streaked onto YPD plates and incubated at the temperature as indicated. (D) Pmk1 deletion affects the cytokinesis defects of the  $\Delta rlc1$  mutants. Cells as indicated were incubated at 30°C and then stained with calcofluor to visualize the cell wall and septum. Bar, 10  $\mu$ m. (E) Pmk1 deletion rescued the temperature sensitivity of the *myo2-E1* mutants. Cells as indicated were streaked onto YPD plates and incubated at the temperature as indicated. (F) Pmk1 deletion failed to rescue the cytokinesis defects of the *myo2-E1* mutants. Cells as indicated were analyzed as in (B). Bar, 10  $\mu$ m.

**A**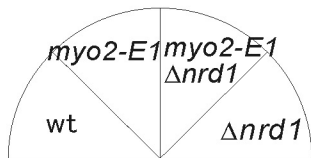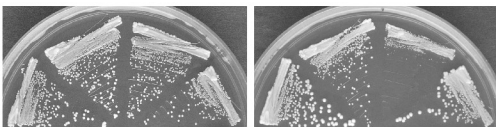

27°C

30°C

**C***myo2-E1**myo2-E1*  
 $\Delta nrd1$ 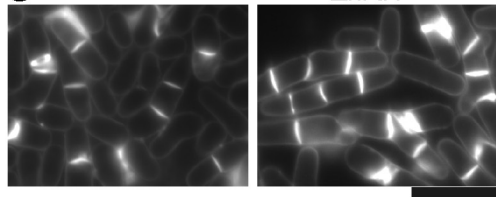**B**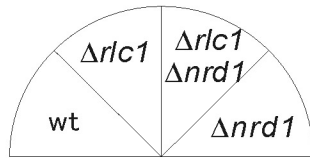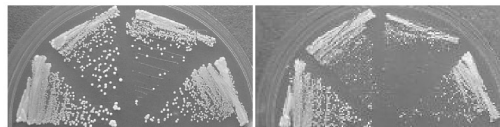

30°C

23°C

**D** $\Delta rlc1$  $\Delta rlc1$   
 $\Delta nrd1$ 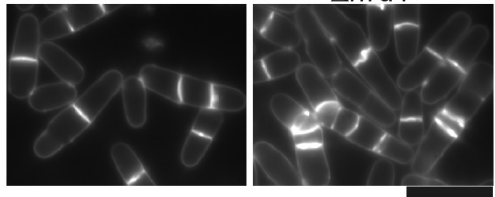

Figure S1 Satoh *et al.*,

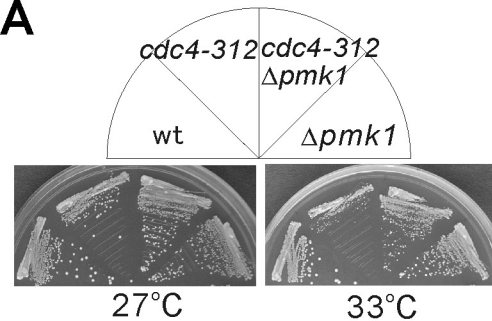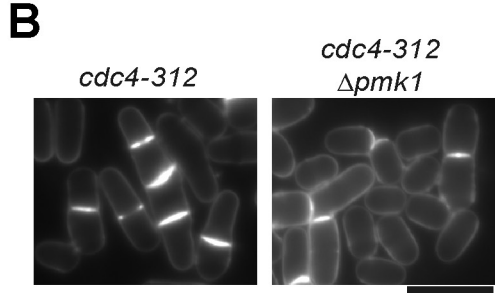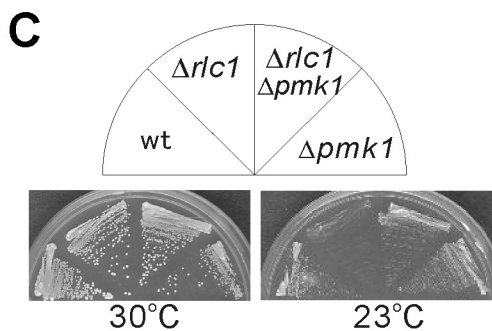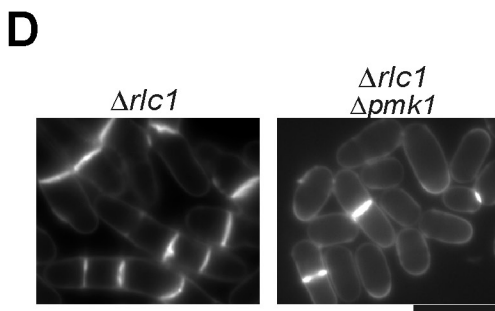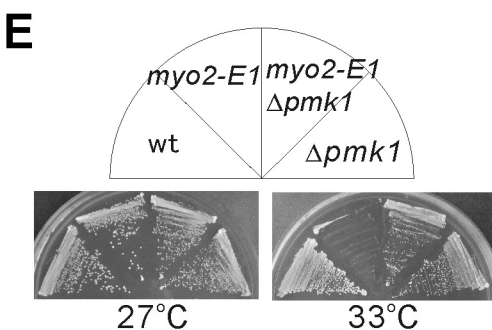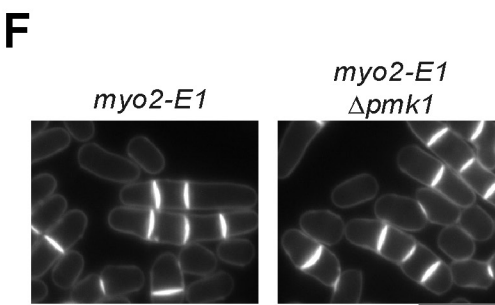

Figure S2 Satoh *et al.*,

**Supplementary Table 1.**

Genetic interactions between *Δnrd1* and genes regulating cytokinesis

|                                                                                                                                                 |                        | Phenotypes of double mutant with <i>nrd1Δ</i> |                           |
|-------------------------------------------------------------------------------------------------------------------------------------------------|------------------------|-----------------------------------------------|---------------------------|
| Strain                                                                                                                                          | Gene product           | Growth                                        | Cell separation phenotype |
| <i>Δrlc1</i>                                                                                                                                    | Regulatory light chain | SG                                            | aggravated                |
| <i>myo2-E1</i>                                                                                                                                  | Myosin II heavy chain  | SG                                            | aggravated                |
| <i>Δmyo3</i>                                                                                                                                    | Myosin II heavy chain  | SG                                            | aggravated                |
| <i>rng2-D5</i>                                                                                                                                  | IQGAP                  | No effect                                     | No effect                 |
| <i>rng3-65</i>                                                                                                                                  | UCS-domain protein     | improved                                      | improved                  |
| <i>cdc12-112</i>                                                                                                                                | Formin                 | No effect                                     | No effect                 |
| Growth of each double mutant strain was compared with those of the corresponding parental strains. SG, slow growth under restrictive conditions |                        |                                               |                           |

**Supplementary Table 2.**

Genetic interactions between  $\Delta pmk1$  and genes regulating cytokinesis

|                                                                                                                                                 |                        | Phenotypes of double mutant with <i>pmk1</i> $\Delta$ |                           |
|-------------------------------------------------------------------------------------------------------------------------------------------------|------------------------|-------------------------------------------------------|---------------------------|
| Strain                                                                                                                                          | Gene product           | Growth                                                | Cell separation phenotype |
| <i><math>\Delta rlc1</math></i>                                                                                                                 | Regulatory light chain | improved                                              | improved                  |
| <i>myo2-E1</i>                                                                                                                                  | Myosin II heavy chain  | improved                                              | No effect                 |
| <i><math>\Delta myo3</math></i>                                                                                                                 | Myosin II heavy chain  | improved                                              | No effect                 |
| <i>rng2-D5</i>                                                                                                                                  | IQGAP                  | No effect                                             | No effect                 |
| <i>rng3-65</i>                                                                                                                                  | UCS-domain protein     | No effect                                             | No effect                 |
| <i>cdc12-112</i>                                                                                                                                | Formin                 | No effect                                             | No effect                 |
| Growth of each double mutant strain was compared with those of the corresponding parental strains. SG, slow growth under restrictive conditions |                        |                                                       |                           |
